# Supplementary material for: Clinical landscape of oncolytic virus research in 2020
Source: PubMed Central journal article supplement — J Immunother Cancer. 2020 Oct 12;8(2):e001486. doi: 10.1136/jitc-2020-001486 (PMC7552841; doi:10.1136/jitc-2020-001486), 2020-10-12
Supplement: jitc-2020-001486supp002.pdf [file jitc-2020-001486supp002.pdf]

**Supplementary Table 2. High-grade 3 (a) and 4 (b) treatment-emergent adverse events in oncolytic virus clinical trials by major routes of administration**

| <i>Event</i>               | <i>Intratumoral</i> | <i>Intravenous</i> | <i>Other Drugs</i>               | <i>Total Number</i> |
|----------------------------|---------------------|--------------------|----------------------------------|---------------------|
| <b>Airway obstruction</b>  | 1                   | 0                  | None                             | 1                   |
| <b>Anorexia</b>            | 1                   | 0                  | None                             | 1                   |
| <b>Diarrhea</b>            | 0                   | 2                  | None                             | 2                   |
| <b>Hyperglycemia</b>       | 1                   | 0                  | None                             | 1                   |
| <b>Increased uric acid</b> | 0                   | 1                  | None                             | 1                   |
| <b>Lymphopenia</b>         | 1                   | 1                  | Chemotherapy                     | 2                   |
| <b>Neutropenia</b>         | 1                   | 3                  | Chemotherapy                     | 4                   |
| <b>Optic atrophy</b>       | 1                   | 0                  | None                             | 1                   |
| <b>Pneumonitis</b>         | 0                   | 1                  | Pembrolizumab                    | 1                   |
| <b>Pulmonary embolism</b>  | 2                   | 0                  | None                             | 2                   |
| <b>Seizure</b>             | 0                   | 1                  | None                             | 1                   |
| <b>Sepsis</b>              | 0                   | 1                  | Chemotherapy                     | 1                   |
| <b>Thrombocytopenia</b>    | 3                   | 0                  | Chemotherapy<br>Targeted Therapy | 3                   |

**Supplementary Table 3. High-grade 3 (a) and 4 (b) treatment-emergent adverse events in oncolytic virus clinical trials by major routes of administration**

| <i>Event</i>                | <i>Intratumoral</i> |                                 | <i>Intravenous</i> |                           | <i>Total</i> |
|-----------------------------|---------------------|---------------------------------|--------------------|---------------------------|--------------|
|                             | <i>N</i>            | <i>Other Drugs</i>              | <i>N</i>           | <i>Other Drugs</i>        |              |
| <b>Anemia</b>               | 1                   | None                            | 3                  | Chemotherapy              | 4            |
| <b>Anorexia</b>             | 0                   | n/a                             | 1                  | None                      | 1            |
| <b>Aseptic meningitis</b>   | 0                   | n/a                             | 1                  | None                      | 1            |
| <b>Cellulitis</b>           | 1                   | None                            | 0                  | n/a                       | 1            |
| <b>DVT</b>                  | 1                   | None                            | 0                  | n/a                       | 1            |
| <b>Dehydration</b>          | 1                   | Ipilimumab                      | 0                  | n/a                       | 1            |
| <b>Diarrhea</b>             | 3                   | Ipilimumab <sup>1</sup>         | 1                  | Chemotherapy              | 4            |
| <b>Dyspnea</b>              | 2                   | None                            | 1                  | None                      | 3            |
| <b>Fatigue</b>              | 3                   | Ipilimumab <sup>1</sup>         | 5                  | Chemotherapy <sup>1</sup> | 8            |
| <b>Febrile neutropenia</b>  | 0                   | n/a                             | 1                  | Chemotherapy              | 1            |
| <b>Fever</b>                | 4                   | Ipilimumab <sup>1</sup>         | 4                  | Chemotherapy <sup>1</sup> | 8            |
| <b>Flu-like symptoms</b>    | 1                   | Ipilimumab <sup>1</sup>         | 1                  | None                      | 2            |
| <b>Hepatitis</b>            | 0                   | n/a                             | 1                  | Pembrolizumab             | 1            |
| <b>Hyperglycemia</b>        | 1                   | None                            | 0                  | n/a                       | 1            |
| <b>Hypoglycemia</b>         | 2                   | None                            | 0                  | n/a                       | 2            |
| <b>Hypokalemia</b>          | 1                   | None                            | 0                  | n/a                       | 1            |
| <b>Hyponatremia</b>         | 1                   | None                            | 1                  | None                      | 2            |
| <b>Hypophosphatemia</b>     | 1                   | None                            | 1                  | None                      | 2            |
| <b>Hypotension</b>          | 0                   | n/a                             | 2                  | Chemotherapy <sup>1</sup> | 2            |
| <b>Increased LFTs</b>       | 1                   | Pro-drug                        | 2                  | Chemotherapy <sup>1</sup> | 3            |
| <b>Infection</b>            | 1                   | None                            | 0                  | n/a                       | 1            |
| <b>Infusion reaction</b>    | 0                   | n/a                             | 1                  | None                      | 1            |
| <b>Leukopenia</b>           | 3                   | None                            | 6                  | Chemotherapy <sup>2</sup> | 9            |
| <b>Myalgias</b>             | 0                   | n/a                             | 1                  | Chemotherapy              | 1            |
| <b>Nausea</b>               | 1                   | Ipilimumab <sup>1</sup>         | 4                  | Chemotherapy <sup>3</sup> | 5            |
| <b>Neutropenia</b>          | 0                   | n/a                             | 7                  | Chemotherapy <sup>4</sup> | 7            |
| <b>Pain</b>                 | 5                   | None                            | 2                  | Chemotherapy <sup>1</sup> | 7            |
| <b>Pneumothorax</b>         | 0                   | n/a                             | 1                  | None                      | 1            |
| <b>Prolonged PT</b>         | 1                   | Pro-drug and radiation          | 1                  | None                      | 2            |
| <b>Respiratory distress</b> | 0                   | n/a                             | 1                  | Chemotherapy              | 1            |
| <b>Seizure</b>              | 0                   | n/a                             | 1                  | None                      | 1            |
| <b>Thrombocytopenia</b>     | 0                   | n/a                             | 6                  | Chemotherapy <sup>5</sup> | 6            |
| <b>Tumor lysis syndrome</b> | 1                   | Pro-drug                        | 0                  | n/a                       | 1            |
| <b>Urinary frequency</b>    | 1                   | 5-FC, valganciclovir, radiation | 0                  | n/a                       | 1            |
| <b>Urinary retention</b>    | 1                   | None                            | 0                  | n/a                       | 1            |
| <b>Vomiting</b>             | 2                   | Ipilimumab <sup>1</sup>         | 2                  | Chemotherapy <sup>3</sup> | 4            |

<sup>1</sup>Used in one patient; <sup>2</sup>Used in four patients; <sup>3</sup>Used in two patients; <sup>4</sup>Used in five patients; <sup>5</sup>Used in three patients; Abbreviations: DVT, deep venous thrombosis; LFTs, liver function tests; n/a, not applicable; PT, prothrombin time; 5-FC, 5-fluorocytosine.
